# Supplementary material
Source: PubMed Central journal article supplement (PMC5381452)
Supplement: Supplementary_Material_714.pdf [file Supplementary_Material_714.pdf]

### Supplementary Table 1

$V_T$  (mean  $\pm$  SD) obtained from Logan graphical analysis (n = 6).

| Brain region    | Logan-baseline  | Logan-blocking  |
|-----------------|-----------------|-----------------|
| Parietal cortex | 1.96 $\pm$ 0.29 | 1.39 $\pm$ 0.16 |
| Frontal cortex  | 2.35 $\pm$ 0.48 | 1.84 $\pm$ 0.39 |
| Whole brain     | 2.46 $\pm$ 0.21 | 1.55 $\pm$ 0.15 |
| Cortex Total    | 2.18 $\pm$ 0.17 | 1.59 $\pm$ 0.18 |
| Thalamus        | 2.19 $\pm$ 0.32 | 1.46 $\pm$ 0.12 |

### Supplementary Table 2

$BP_{ND}$  (mean  $\pm$  SD) obtained by  $k_3/k_4$  with 2TCM fit (n = 6).

| Brain region     | Baseline        | Blocking           |
|------------------|-----------------|--------------------|
| Striatum         | 9.17 $\pm$ 1.90 | 1.38 $\pm$ 0.63*** |
| Midbrain         | 1.09 $\pm$ 0.35 | 0.92 $\pm$ 0.46    |
| Hippocampus      | 1.12 $\pm$ 0.46 | 1.17 $\pm$ 0.38    |
| Cerebellum       | 1.08 $\pm$ 0.23 | 1.03 $\pm$ 0.53    |
| Occipital cortex | 1.54 $\pm$ 0.42 | 1.10 $\pm$ 0.35    |

Significant difference against baseline is indicated by: \*\*\*p < 0.001.

### Supplementary Table 3

Striatal  $BP_{ND}$  (mean  $\pm$  SD) obtained from different modeling methods.

| Reference region | 2TCM-baseline   | 2TCM-blocking      | Logan-baseline  | SRTM-baseline   | MRTM-baseline   | RLogan-baseline |
|------------------|-----------------|--------------------|-----------------|-----------------|-----------------|-----------------|
| Midbrain         | 6.11 $\pm$ 0.62 | 0.35 $\pm$ 0.17*** | 5.69 $\pm$ 0.68 | 5.48 $\pm$ 0.53 | 5.46 $\pm$ 0.54 | 5.58 $\pm$ 0.55 |
| Hippocampus      | 5.62 $\pm$ 0.52 | 0.39 $\pm$ 0.34*** | 5.67 $\pm$ 0.48 | 5.41 $\pm$ 0.51 | 5.38 $\pm$ 0.52 | 5.50 $\pm$ 0.51 |
| Cerebellum       | 5.64 $\pm$ 0.99 | 0.49 $\pm$ 0.37*** | 5.27 $\pm$ 0.47 | 5.04 $\pm$ 0.85 | 5.01 $\pm$ 0.88 | 5.17 $\pm$ 0.87 |
| Occipital cortex | 5.59 $\pm$ 1.04 | 0.49 $\pm$ 0.37*** | 5.59 $\pm$ 0.37 | 5.38 $\pm$ 0.98 | 5.30 $\pm$ 0.99 | 5.50 $\pm$ 0.98 |

$BP_{ND}$  obtained from 2TCM and Logan plot was calculated from the  $V_T$  using the formula  $BP_{ND} = (V_T - V_{ND})/V_{ND}$  (n = 6). Significant differences against baseline are indicated by: \*\*\*p < 0.001.

### Supplementary Table 4

% Difference ( $\Delta$ , mean  $\pm$  SD) of  $BP_{ND}$  derived from Logan plot and reference tissue-based modeling methods as compared with  $BP_{ND}$  calculated from 2TCM.

| Reference region | Logan (%)      | SRTM (%)        | MRTM (%)        | RLogan (%)     |
|------------------|----------------|-----------------|-----------------|----------------|
| Midbrain         | -7.2 $\pm$ 3.1 | -13.2 $\pm$ 4.1 | -11.1 $\pm$ 2.1 | -9.0 $\pm$ 2.0 |
| Hippocampus      | 0.8 $\pm$ 3.8  | -3.6 $\pm$ 8.2  | -4.2 $\pm$ 7.4  | -3.0 $\pm$ 7.2 |
| Cerebellum       | -6.7 $\pm$ 2.7 | -12.2 $\pm$ 2.9 | -11.4 $\pm$ 2.6 | -9.8 $\pm$ 3.0 |
| Occipital cortex | -3.6 $\pm$ 4.7 | -9.2 $\pm$ 3.5  | -8.6 $\pm$ 3.8  | -6.9 $\pm$ 3.0 |

$\Delta = 2 \times 100 \times (BP_{ND,1} - BP_{ND,2}) / (BP_{ND,1} + BP_{ND,2})$ , where  $BP_{ND,1}$  was derived from 2TCM, Logan plot, SRTM, MRTM, and RLogan, and  $BP_{ND,2}$  was calculated from 2TCM.  $BP_{ND}$  obtained from 2TCM and Logan plot was calculated from the  $V_T$  using the formula  $BP_{ND} = (V_T - V_{ND}) / V_{ND}$  ( $n = 6$ ).

### Supplementary Table 5

$k_2'$  (mean  $\pm$  SD) values obtained from SRTM and MRTM at baseline ( $n = 6$ ).

| Reference region | SRTM ( $\text{min}^{-1}$ ) | MRTM ( $\text{min}^{-1}$ ) |
|------------------|----------------------------|----------------------------|
| Midbrain         | 0.41 $\pm$ 0.06            | 0.38 $\pm$ 0.06            |
| Hippocampus      | 0.44 $\pm$ 0.05            | 0.43 $\pm$ 0.06            |
| Cerebellum       | 0.45 $\pm$ 0.02            | 0.42 $\pm$ 0.05*           |
| Occipital cortex | 0.39 $\pm$ 0.06            | 0.39 $\pm$ 0.08            |

Significant difference against SRTM is indicated by: \* $p < 0.05$ .

### Supplementary Table 6

Test-retest variability (TRV) (%) and intra-class coefficient (ICC) for striatal  $BP_{ND}$  obtained from different models and reference regions ( $n = 5$ ).

| Reference region | SRTM                 |                  | RLogan  |      | MRTM    |      | MRTM2   |      | <sup>a</sup> $SUV_r - 1$ |      |
|------------------|----------------------|------------------|---------|------|---------|------|---------|------|--------------------------|------|
|                  | <sup>b</sup> TRV (%) | <sup>c</sup> ICC | TRV (%) | ICC  | TRV (%) | ICC  | TRV (%) | ICC  | TRV (%)                  | ICC  |
| Midbrain         | 5.8                  | 0.92             | 6.1     | 0.88 | 10.5    | 0.89 | 8.1     | 0.91 | 10.2                     | 0.83 |
| Hippocampus      | 8.8                  | 0.38             | 8.8     | 0.41 | 8.6     | 0.43 | 8.7     | 0.41 | 8.7                      | 0.41 |
| Cerebellum       | 6.4                  | 0.89             | 8.5     | 0.91 | 7.3     | 0.90 | 7.3     | 0.90 | 5.7                      | 0.94 |
| Occipital cortex | 5.1                  | 0.93             | 6.0     | 0.92 | 6.7     | 0.91 | 4.6     | 0.93 | 6.4                      | 0.94 |

<sup>a</sup> $SUV_r = SUV_{striatum} / SUV_{reference}$

<sup>b</sup> $TRV = 2 \times ABS(BP_{ND,test} - BP_{ND,retest}) / (BP_{ND,test} + BP_{ND,retest})$

<sup>c</sup> $ICC = (BMS - WMS) / (BMS + WMS)$ , where BMS is the mean sum of squares between subjects, and WMS is the mean sum of squares within subjects.

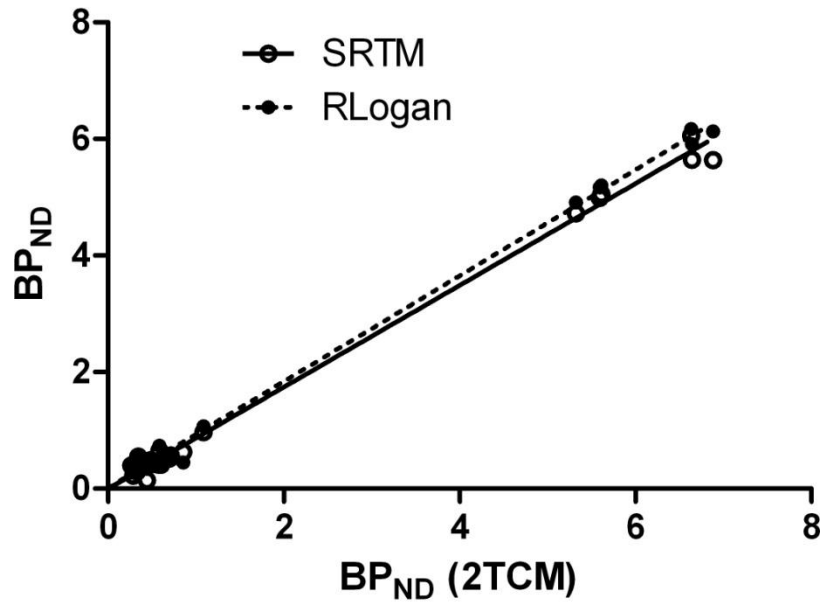

$$BP_{ND,SRTM} = 0.87BP_{ND,2TCM} + 0.01, R^2 = 0.995$$

$$BP_{ND,RLogan} = 0.91BP_{ND,2TCM} + 0.02, R^2 = 0.997$$

**Supplementary Figure 1.** Correlation of  $BP_{ND}$  values in striatum, frontal cortex, whole brain, and thalamus obtained from 2TCM with the values obtained from SRTM and RLogan. 2TCM  $BP_{ND}$  was calculated from the  $V_T$  using the formula

$$BP_{ND} = (V_T - V_{ND})/V_{ND}. \text{ Midbrain was used as the reference region.}$$
